# Supplementary material for: Phenolic-Rich Extracts from Avocado Fruit Residues as Functional Food Ingredients with Antioxidant and Antiproliferative Properties
Source: MDPI journal article supplement (doi:10.3390/biom11070977), 2021-07-02
Supplement: s1 [file s1]

# Phenolic-Rich Extracts from Avocado Fruit Residues as Functional Food Ingredients with Antioxidant and Antiproliferative Properties

Gustavo R. Velderrain-Rodríguez <sup>1</sup>, Javier Quero <sup>2</sup>, Jesús Osada <sup>2,3,4</sup>, Olga Martín-Belloso <sup>1</sup> and María Jesús Rodríguez-Yoldi <sup>2,4,\*</sup>

<sup>1</sup> Agrotecnio Center, Department of Food Technology, University of Lleida, Av. Alcalde Rovira Roure 191, 25198 Lleida, Spain; grvelderrain@gmail.com (G.R.V.-R.); olga.martin@udl.cat (O.M.-B.)

<sup>2</sup> Department of Pharmacology and Physiology, Forensic and Legal Medicine, Veterinary Faculty, University of Zaragoza, 50013 Zaragoza, Spain; javierquero94@gmail.com (J.Q.); josada@unizar.es (J.O.)

<sup>3</sup> Department of Biochemistry and Molecular Cell Biology, Veterinary Faculty, University of Zaragoza, 50009 Zaragoza, Spain

<sup>4</sup> CIBERobn, ISCIII, IIS Aragón, IA2, 28029 Madrid, Spain

\* Correspondence: mjrodyol@unizar.es; Tel.: +34-976-761649

## SUPPLEMENTARY TABLES

**Table S1.** Commercial standards used for the phenolic compounds identification and quantification in the avocado peel, seed coat and seed extracts by UPLC-ESI-MS/MS.

|    | Compound                             | Standard Used for Quantification | Purchased From |
|----|--------------------------------------|----------------------------------|----------------|
| 1  | p-Hydroxybenzoic Acid                | p-Hydroxybenzoic Acid            | Sigma-Aldrich  |
| 2  | Vanillin                             | Vanillin                         | Sigma-Aldrich  |
| 3  | Vanillic acid                        | Vanillic acid                    | Fluka          |
| 4  | Syringic acid                        | Syringic acid                    | Sigma-Aldrich  |
| 5  | Protocatehuic Acid                   | Protocatehuic Acid               | Sigma-Aldrich  |
| 6  | Protocatehuic Acid Glucoside         | Protocatehuic Acid               |                |
| 7  | Hydroxytyrosol                       | Hydroxytyrosol                   | Extrasynthese  |
| 8  | Hydroxytyrosol Glucoside             | Hydroxytyrosol                   |                |
| 9  | Hydroxysalidroside                   | Hydroxytyrosol                   |                |
| 10 | Hydroxytyrosol Glucoside Arabinoside | Hydroxytyrosol                   |                |
| 11 | Tyrosol Glucoside                    | Tyrosol                          | Sigma-aldrich  |
| 12 | Salidroside                          | Tyrosol                          |                |
| 13 | Tyrosol Glucoside Arabinoside        | Tyrosol                          |                |
| 14 | p-Cumaric Acid                       | p-Cumaric Acid                   | Extrasynthese  |
| 15 | Coumaric acid glucoside              | p-Cumaric Acid                   |                |
| 16 | Coumaroylquinic Acid                 | p-Cumaric Acid                   |                |
| 17 | Caffeic Acid                         | Caffeic Acid                     | Sigma-aldrich  |
| 18 | Caffeic Acid Glucoside               | Caffeic Acid                     |                |
| 19 | Caffeic acid glucoside derivative    | Caffeic acid                     |                |
| 20 | Dihydrocaffeic acid glucoside        | Caffeic acid                     |                |
| 21 | Caffeoylshikimic Acid                | Caffeic acid                     |                |
| 22 | 3-O-Caffeoylquinic Acid              | 5-O-Caffeoylquinic Acid          |                |

|    |                                    |                          |               |
|----|------------------------------------|--------------------------|---------------|
| 23 | 4-O-Caffeoylquinic Acid            | 5-O-Caffeoylquinic Acid  | Extrasynthese |
| 24 | 5-O-Caffeoylquinic Acid            | 5-O-Caffeoylquinic Acid  |               |
| 25 | Dicaffeoylquinic acid              | 5-O-Caffeoylquinic Acid  |               |
| 26 | Ferulic Acid                       | Ferulic Acid             | Fluka         |
| 27 | Ferulic Acid Glucoside             | Ferulic Acid             |               |
| 28 | Dihydroferulic Acid Glucoside      | Ferulic Acid             |               |
| 29 | 4-O-Feruloylquinic Acid            | Ferulic Acid             |               |
| 30 | 5-O-Feruloylquinic Acid            | Ferulic Acid             |               |
| 31 | 3-O-Feruloylquinic Acid            | Ferulic Acid             |               |
| 32 | Catechin                           | Catechin                 | Sigma-Aldrich |
| 33 | Epicatechin                        | Epicatechin              | Sigma-Aldrich |
| 34 | Catechin glucoside                 | Catechin                 |               |
| 35 | Epicatechin Glucoside              | Epicatechin              |               |
| 36 | Epigallocatechin                   | Epicatechin              |               |
| 37 | Epicatechin Gallate                | Epicatechin              |               |
| 38 | Catechin derivative                | Catechin                 |               |
| 39 | Epicatechin derivative             | Epicatechin              |               |
| 40 | Procyanidin dimer (type A)         | Procyanidin dimer B2     | Extrasynthese |
| 41 | Procyanidin dimer (type B)         | Procyanidin dimer B2     |               |
| 42 | Procyanidin trimer (type A)        | Procyanidin dimer B2     |               |
| 43 | Procyanidin trimer (type B)        | Procyanidin dimer B2     |               |
| 44 | Procyanidin tetramer               | Procyanidin dimer B2     |               |
| 45 | Procyanidin pentamer               | Procyanidin dimer B2     |               |
| 46 | Procyanidin hexamer                | Procyanidin hexamer      |               |
| 47 | Quercetin                          | Quercetin                | Extrasynthese |
| 48 | Quercetin Arabinoside              | Quercetin-3-O-glucoside  |               |
| 49 | Quercetin Glucoside                | Quercetin-3-O-glucoside  | Extrasynthese |
| 50 | Quercetin Rhamnoside               | Quercetin-3-O-glucoside  |               |
| 51 | Quercetin Glucuronide              | Quercetin                |               |
| 52 | Quercetin acetylglucoside          | Quercetin                |               |
| 53 | Quercetin glucoside arabinoside    | Quercetin-3-O-glucoside  |               |
| 54 | Quercetin Rutinoside               | Quercetin Rutinoside     | Extrasynthese |
| 55 | Quercetin Diglucoside              | Quercetin-3-O-glucoside  |               |
| 56 | Quercetin glucoside rhamnoside     | Quercetin-3-O-glucoside  |               |
| 57 | Isorhamnetin                       | Isorhamnetin             | Extrasynthese |
| 58 | Isorhamnetin Derivate              | Isorhamnetin             |               |
| 59 | Isorhamnetin Arabinoside           | Isorhamnetin             |               |
| 60 | Isorhamnetin glucoside             | Isorhamnetin             |               |
| 61 | Isorhamnetin Glucuronide           | Isorhamnetin             |               |
| 62 | Isorhamnetin Arabinoside Glucoside | Isorhamnetin             |               |
| 63 | Kaempferol arabinoside             | Kaempferol-3-O-glucoside | Extrasynthese |
| 64 | Kaempferol Glucoside               | Kaempferol-3-O-glucoside |               |
| 65 | Kaempferol Rutinoside              | Kaempferol-3-O-glucoside |               |
| 66 | Kaempferol Arabinoside Glucoside   | Kaempferol-3-O-glucoside |               |
| 67 | Naringenin                         | Naringenin               | Extrasynthese |
| 68 | Naringenin glucoside               | Naringenin               |               |
| 69 | Sakuratetin                        | Naringenin               |               |
| 70 | Luteolin                           | Luteolin                 | Extrasynthese |
| 71 | Luteolin arabinoside glucoside     | Luteolin                 |               |
| 72 | Penstemide                         | Quercetin                |               |

**Table S2.** Optimal selected reaction monitoring (SRM) conditions for the determination of phenolic compounds in avocado peel, seed coat and seed by UPLC-ESI-MS/MS.

|    | Compound                                   | MW<br>(g/mol) | SRM<br>(Quantification) | Cone<br>Voltage<br>(V) | Collision<br>Energy (eV) | Detected in                    |
|----|--------------------------------------------|---------------|-------------------------|------------------------|--------------------------|--------------------------------|
| 1  | p-Hydroxybenzoic<br>Acid                   | 138           | 137 > 93                | 30                     | 15                       | Peel, Seed<br>coat and<br>Seed |
| 2  | Vanillin                                   | 152           | 151 > 136               | 25                     | 10                       | Peel, Seed<br>coat and<br>Seed |
| 3  | Vanillic acid                              | 168           | 167 > 123               | 30                     | 10                       | Peel                           |
| 4  | Syringic acid                              | 198           | 197 > 182               | 30                     | 10                       | Peel                           |
| 5  | Protocatehuic Acid                         | 154           | 153 > 109               | 40                     | 15                       | Peel and<br>seed               |
| 6  | Protocatehuic Acid<br>Glucoside            | 316           | 315 > 153               | 40                     | 20                       | Peel, Seed<br>coat and<br>Seed |
| 7  | Hydroxytyrosol                             | 154           | 153 > 123               | 35                     | 10                       | Peel, Seed<br>coat and<br>Seed |
| 8  | Hydroxytyrosol<br>Glucoside                | 316           | 315 > 153               | 40                     | 20                       | Peel, Seed<br>coat and<br>Seed |
| 9  | Hydroxysalidroside                         | 316           | 315 > 135               | 40                     | 30                       | Peel, Seed<br>coat and<br>Seed |
| 10 | Hydroxytyrosol<br>Glucoside<br>Arabinoside | 448           | 447 > 153               | 40                     | 20                       | Peel and<br>Seed coat          |
| 11 | Tyrosol Glucoside                          | 300           | 299 > 137               | 40                     | 20                       | Peel, Seed<br>coat and<br>Seed |
| 12 | Salidroside                                | 300           | 299 > 179               | 40                     | 10                       | Peel, Seed<br>coat and<br>Seed |
| 13 | Tyrosol Glucoside<br>Arabinoside           | 432           | 431 > 137               | 40                     | 20                       | Peel, Seed<br>coat and<br>Seed |
| 14 | p-Cumaric Acid                             | 164           | 163 > 119               | 35                     | 10                       | Peel, Seed<br>coat and<br>Seed |
| 15 | Coumaric acid<br>glucoside                 | 326           | 325 > 163               | 40                     | 20                       | Peel                           |
| 16 | Coumaroylquinic<br>Acid                    | 338           | 337 > 191               | 40                     | 20                       | Peel, Seed<br>coat and<br>Seed |
| 17 | Caffeic Acid                               | 180           | 179 > 135               | 35                     | 15                       | Peel, Seed<br>coat and<br>Seed |

|    |                                         |     |           |    |    |                                        |
|----|-----------------------------------------|-----|-----------|----|----|----------------------------------------|
| 18 | Caffeic Acid<br>Glucoside               | 342 | 341 > 179 | 40 | 20 | Peel, Seed<br>coat and<br>Seed<br>Peel |
| 19 | Caffeic acid<br>glucoside<br>derivative | 546 | 545 > 341 | 40 | 20 |                                        |
| 20 | Dihydrocaffeic<br>acid glucoside        | 344 | 343 > 181 | 40 | 20 | Peel, Seed<br>coat and<br>Seed         |
| 21 | Caffeoylshikimic<br>Acid                | 336 | 335 > 161 | 40 | 20 | Peel, Seed<br>coat and<br>Seed         |
| 22 | 3-O-<br>Caffeoylquinic<br>Acid          | 354 | 353 > 179 | 40 | 15 | Peel, Seed<br>coat and<br>Seed         |
| 23 | 4-O-<br>Caffeoylquinic<br>Acid          | 354 | 353 > 173 | 40 | 15 | Peel, Seed<br>coat and<br>Seed         |
| 24 | 5-O-<br>Caffeoylquinic<br>Acid          | 354 | 353 > 191 | 40 | 15 | Peel, Seed<br>coat and<br>Seed         |
| 25 | Dicaffeoylquinic<br>acid                | 516 | 515 > 191 | 40 | 30 | Peel                                   |
| 26 | Ferulic Acid                            | 194 | 193 > 134 | 30 | 15 | Peel, Seed<br>coat and<br>Seed         |
| 27 | Ferulic Acid<br>Glucoside               | 356 | 355 > 193 | 40 | 20 | Peel, Seed<br>coat and<br>Seed         |
| 28 | Dihydroferulic<br>Acid Glucoside        | 358 | 357 > 195 | 40 | 20 | Peel, Seed<br>coat and<br>Seed         |
| 29 | 4-O-Feruloylquinic<br>Acid              | 368 | 367 > 173 | 40 | 20 | Peel, Seed<br>coat and<br>Seed         |
| 30 | 5-O-Feruloylquinic<br>Acid              | 368 | 367 > 191 | 40 | 15 | Peel, Seed<br>coat and<br>Seed         |
| 31 | 3-O-Feruloylquinic<br>Acid              | 368 | 367 > 193 | 40 | 15 | Peel, Seed<br>coat and<br>Seed         |
| 32 | Catechin                                | 290 | 289 > 245 | 40 | 15 | Seed coat<br>and Seed                  |
| 33 | Epicatechin                             | 290 | 289 > 245 | 40 | 15 | Peel, Seed<br>coat and<br>Seed         |
| 34 | Catechin glucoside                      | 452 | 451 > 289 | 40 | 25 | Peel, Seed<br>coat and<br>Seed         |

|    |                                |      |             |    |    |                                |
|----|--------------------------------|------|-------------|----|----|--------------------------------|
| 35 | Epicatechin<br>Glucoside       | 452  | 451 > 289   | 40 | 25 | Peel, Seed<br>coat and<br>Seed |
| 36 | Epigallocatechin               | 306  | 305 > 125   | 40 | 15 | Peel, Seed<br>coat and<br>Seed |
| 37 | Epicatechin<br>Gallate         | 442  | 441 > 169   | 40 | 20 | Seed coat<br>and Seed          |
| 38 | Catechin<br>derivative         | 740  | 739 > 289   | 40 | 30 | Peel, Seed<br>coat and<br>Seed |
| 39 | Epicatechin<br>derivative      | 740  | 739 > 289   | 40 | 30 | Peel, Seed<br>coat and<br>Seed |
| 40 | Procyanidin dimer<br>(type A)  | 576  | 575 > 285   | 40 | 20 | Peel, Seed<br>coat and<br>Seed |
| 41 | Procyanidin dimer<br>(type B)  | 578  | 577 > 289   | 40 | 20 | Peel, Seed<br>coat and<br>Seed |
| 42 | Procyanidin trimer<br>(type A) | 864  | 863 > 411   | 40 | 30 | Peel, Seed<br>coat and<br>Seed |
| 43 | Procyanidin trimer<br>(type B) | 866  | 865 > 287   | 60 | 30 | Peel, Seed<br>coat and<br>Seed |
| 44 | Procyanidin<br>tetramer        | 1154 | 1153 > 865  | 70 | 20 | Peel, Seed<br>coat and<br>Seed |
| 45 | Procyanidin<br>pentamer        | 1442 | 1441 > 1028 | 80 | 25 | Peel, Seed<br>coat and<br>Seed |
| 46 | Procyanidin<br>hexamer         | 1730 | 1729 > 1153 | 80 | 30 | Peel, Seed<br>coat and<br>Seed |
| 47 | Quercetin                      | 302  | 301 > 151   | 40 | 15 | Peel, Seed<br>coat and<br>Seed |
| 48 | Quercetin<br>Arabinoside       | 434  | 433 > 300   | 40 | 20 | Peel, Seed<br>coat and<br>Seed |
| 49 | Quercetin<br>Glucoside         | 464  | 463 > 300   | 40 | 30 | Peel, Seed<br>coat and<br>Seed |
| 50 | Quercetin<br>Rhamnoside        | 478  | 477 > 301   | 40 | 25 | Peel                           |
| 51 | Quercetin<br>Glucuronide       | 478  | 477 > 301   | 40 | 25 | Peel, Seed<br>coat and<br>Seed |

|    |                                          |     |           |    |    |                                |
|----|------------------------------------------|-----|-----------|----|----|--------------------------------|
| 52 | Quercetin<br>acetylglucoside             | 506 | 505 > 300 | 40 | 25 | Peel, Seed<br>coat and<br>Seed |
| 53 | Quercetin<br>glucoside<br>arabinoside    | 596 | 595 > 300 | 40 | 30 | Peel, Seed<br>coat and<br>Seed |
| 54 | Quercetin<br>Rutinoside                  | 610 | 609 > 300 | 40 | 30 | Peel, Seed<br>coat and<br>Seed |
| 55 | Quercetin<br>Diglucoside                 | 626 | 625 > 300 | 40 | 30 | Peel, Seed<br>coat and<br>Seed |
| 56 | Quercetin<br>glucoside<br>rhamnoside     | 756 | 755 > 300 | 40 | 35 | Peel                           |
| 57 | Isorhamnetin                             | 316 | 315 > 300 | 40 | 15 | Peel                           |
| 58 | Isorhamnetin<br>Derivate                 |     | 300 > 315 | 40 | 15 | Peel                           |
| 59 | Isorhamnetin<br>Arabinoside              | 448 | 447 > 315 | 40 | 20 | Peel, Seed<br>coat and<br>Seed |
| 60 | Isorhamnetin<br>glucoside                | 478 | 477 > 315 | 40 | 20 | Peel, Seed<br>coat and<br>Seed |
| 61 | Isorhamnetin<br>Glucuronide              | 492 | 491 > 315 | 40 | 20 | Peel and<br>Seed coat          |
| 62 | Isorhamnetin<br>Arabinoside<br>Glucoside | 610 | 609 > 315 | 40 | 30 | Peel                           |
| 63 | Kaempferol<br>arabinoside                | 418 | 417 > 284 | 40 | 20 | Peel and<br>Seed               |
| 64 | Kaempferol<br>Glucoside                  | 448 | 447 > 284 | 40 | 20 | Peel, Seed<br>coat and<br>Seed |
| 65 | Kaempferol<br>Rutinoside                 | 594 | 593 > 284 | 40 | 30 | Peel                           |
| 66 | Kaempferol<br>Arabinoside<br>Glucoside   | 580 | 579 > 284 | 40 | 30 | Peel, Seed<br>coat and<br>Seed |
| 67 | Naringenin                               | 272 | 271 > 151 | 40 | 15 | Peel, Seed<br>coat and<br>Seed |
| 68 | Naringenin<br>glucoside                  | 434 | 433 > 271 | 40 | 20 | Peel, Seed<br>coat and<br>Seed |
| 69 | Sakuratetin                              | 286 | 285 > 199 | 40 | 20 | Peel and<br>Seed               |
| 70 | Luteolin                                 | 286 | 285 > 133 | 40 | 20 | Seed and<br>Seed               |

|    |                                      |     |           |    |    |                                |
|----|--------------------------------------|-----|-----------|----|----|--------------------------------|
| 71 | Luteolin<br>arabinoside<br>glucoside | 580 | 579 > 285 | 40 | 30 | Peel                           |
| 72 | Penstemide                           | 444 | 443 > 119 | 40 | 25 | Peel, Seed<br>coat and<br>Seed |
